# Supplementary material for: Accelerating effects of genipin-crosslinked small intestinal submucosa for defected gastric mucosa repair
Source: Royal Society of Chemistry journal article supplement (doi:10.1039/c7tb00517b), 2017-01-01
Supplement: c7tb00517b1.pdf [file c7tb00517b1.pdf]

### *Supplementary information*

**Fig. S1.** Intraoperative photographs before and after the scaffolds were covered on the defected areas. Graphs before (A) SIS and (C) GP-CR SIS were anchored. Graphs after (B) SIS and (D) GP-CR SIS were anchored with 5-0 non-absorbable suture.

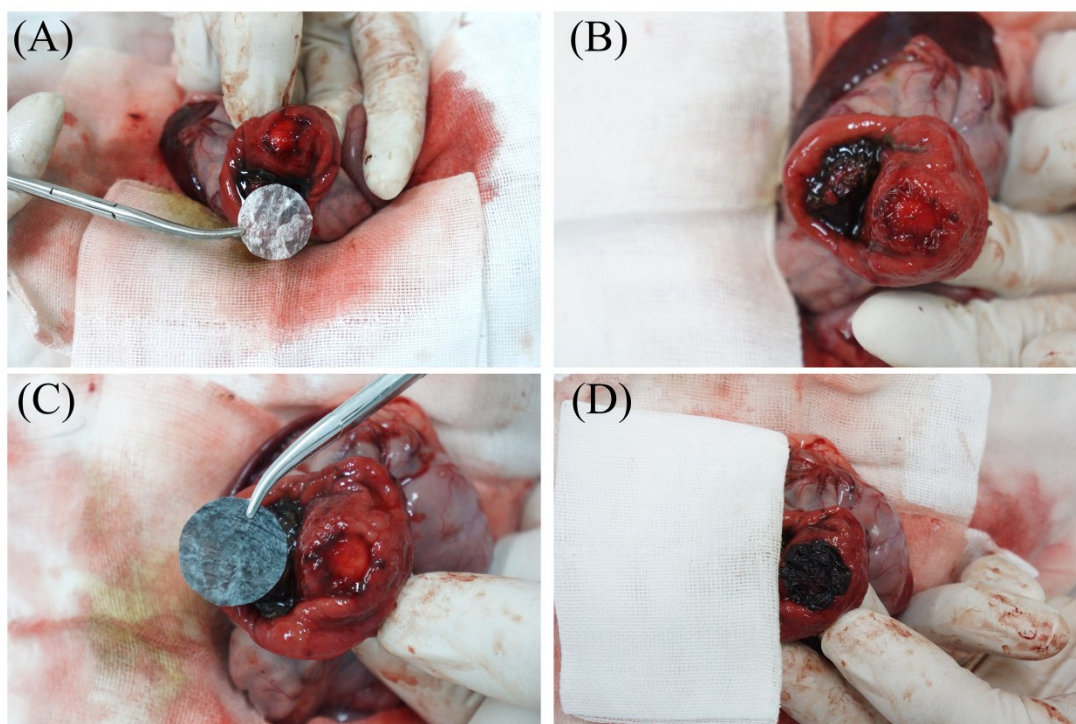

**Fig. S2.** Macrograph of hemolysis for GP-CR SIS scaffolds. A. The extract of 0.5%GP-CR SIS. B. The extract of 0.3%GP-CR SIS. C. The extract of 0.1%GP-CR SIS. D. The extract of 0.05%GP-CR SIS. E. The extract of SIS. F. Negative control group of physiological saline. G. Positive control group of deionized water.

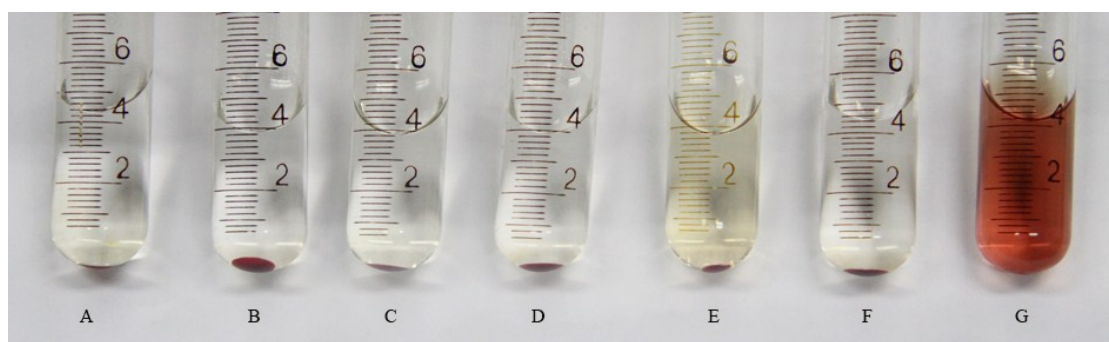

**Fig. S3.** Representative digital photographs of defected gastric mucosa in stomach of different groups retrieved at 1, 2 and 4 weeks after implantation.

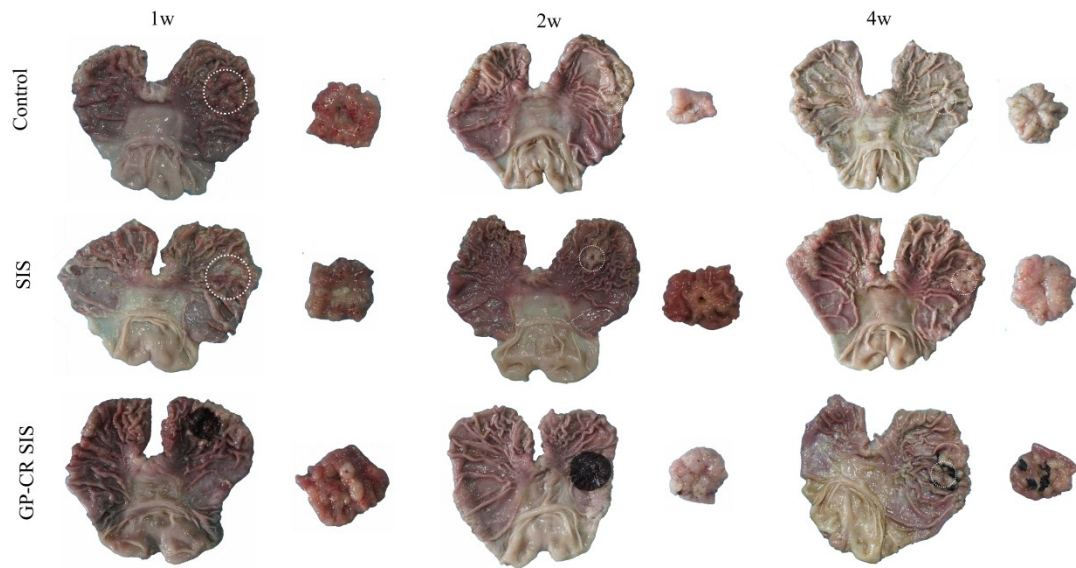

**Fig. S4.** The optimization of conditions for the modification of SIS by genipin-crosslinking. A. The crosslinking degree of SIS fixed with genipin at different concentrations. B. The crosslinking degree of SIS fixed with genipin at different temperatures. C. The crosslinking degree of SIS fixed with genipin at various elapsed crosslinking durations.

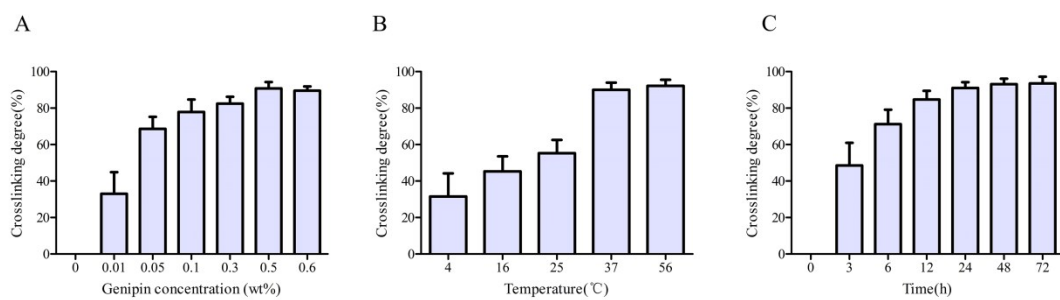

**Fig. S5.** Inhibition of *Helicobacter pylori* by (A) PBS, (B) penicillin, (C) SIS, (D) 0.05%GP-CR SIS, (E) 0.1%GP-CR SIS, (F) 0.3%GP-CR SIS and (G) 0.5%GP-CR SIS.

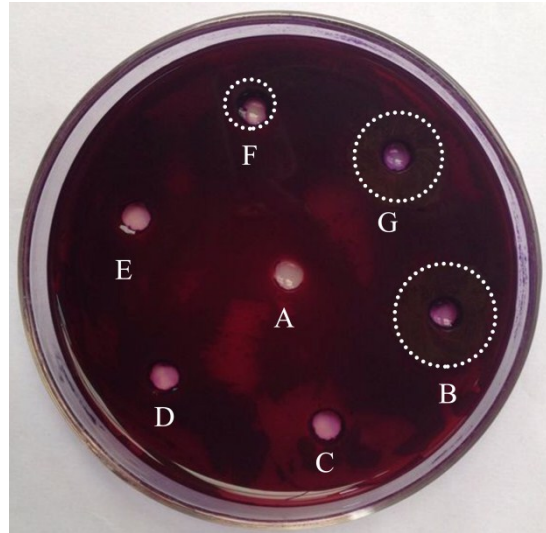

**Fig. S6.** The content of VEGF and TGF- $\beta$  in SIS before and after genipin crosslinking.

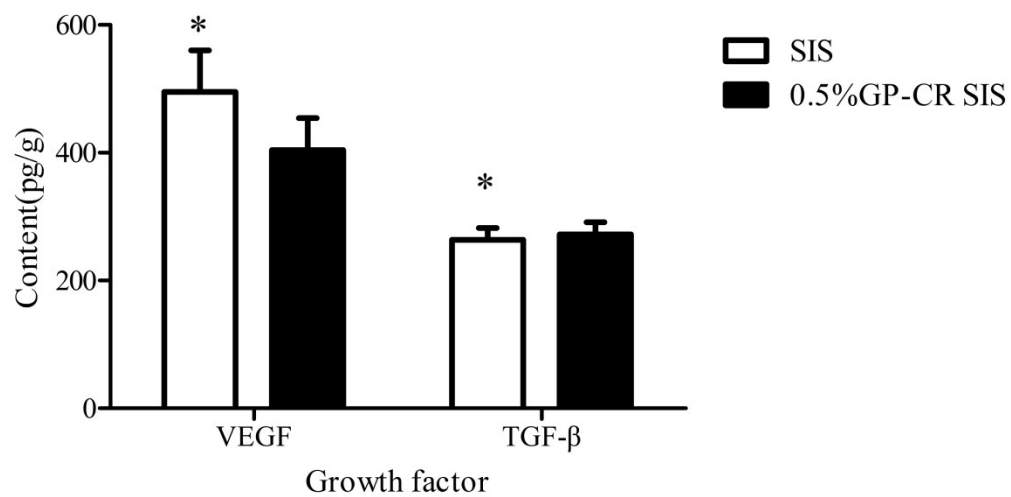

**Fig. S7.** Graphs represent the proliferating epithelial cells with immunofluorescent staining against Ki67 in ulcer margin of the different groups at day 7. Scale bar: 50  $\mu$ m. Red: Ki67; Blue: DAPI which stains nucleus. Pink: blue merged with red.



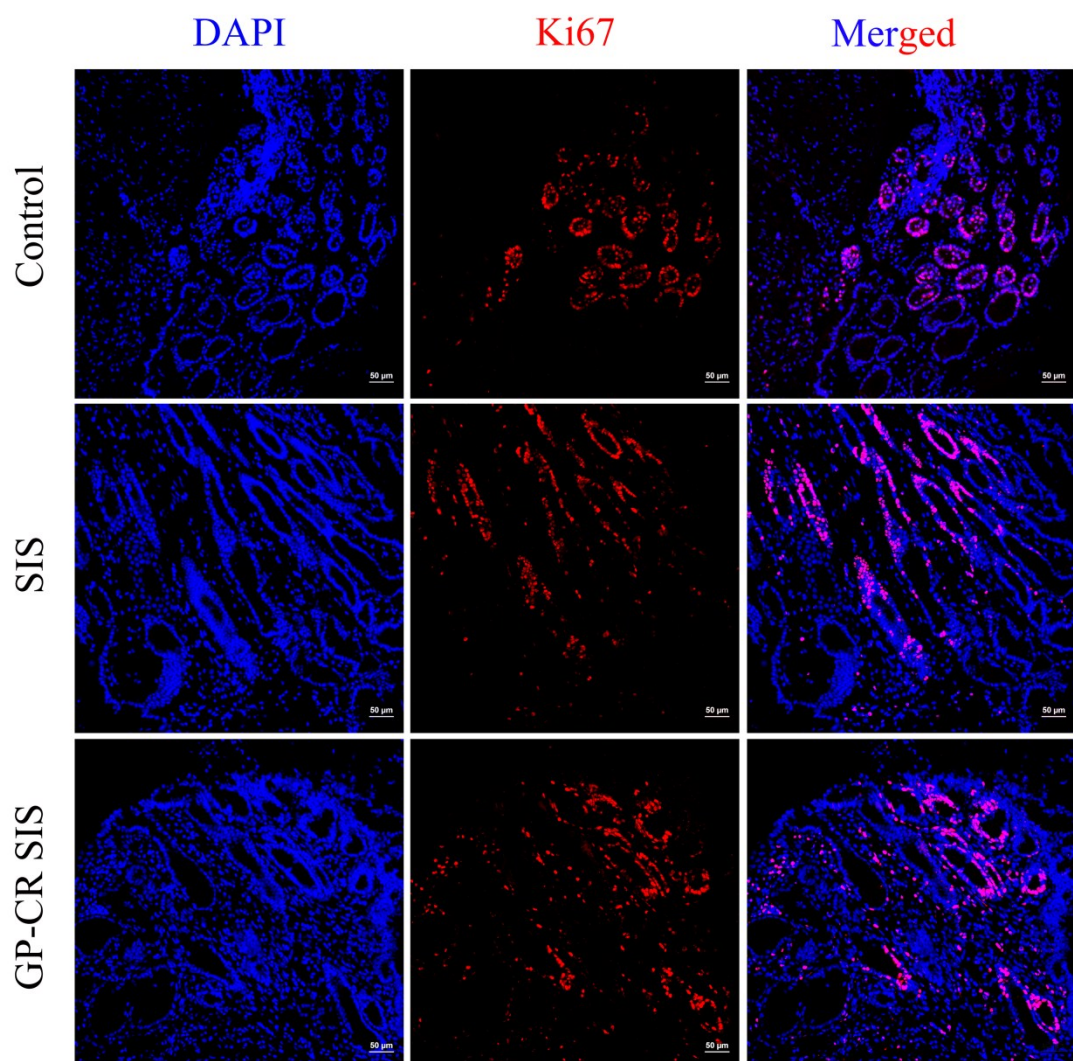

**Table S1**

**Primer sequences for real-time quantitative polymerase chain reaction (PCR)**

| Target | Primer sequences(5'–3')   | GenBank no.    |
|--------|---------------------------|----------------|
| GAPDH  | F: CCACTTTGTGAAGCTCATTTCT | NM_001082253.1 |
|        | R: TCGTCCTCCTCTGGTGCTCT   |                |
| VEGFR2 | F: GTGTGGTCTTTTCGGCGTGT   | NM_001195670.1 |
|        | R: GCTCTCATTCTCGTGCCTTCTT |                |
| ANGPT2 | F: CAGCACGACCTGACAGAG     | XM_002720896.2 |
|        | R: TTTAGCCGCAAAGGAGTT     |                |

|      |                                                      |                |
|------|------------------------------------------------------|----------------|
| EGFR | F: TGGGTCCAAGCCTTACGA<br>R: GGGCGACTGTCAGCATCT       | XM_008261843.1 |
| COX2 | F:GGTGTGAAAGGCAAGAAAGAAC<br>R:TTGAAGAACTGGTGGGTGAAGT | U97696.1       |

---

**Table S2**

**The calcium content of scaffolds before and after implantation**

| Group           | Calcium content ( $\mu\text{g}$ calcium/mg dry tissue weight) |                        |
|-----------------|---------------------------------------------------------------|------------------------|
|                 | Before implantation                                           | 4-week postoperatively |
| SIS             | $0.42 \pm 0.05$                                               | $0.72 \pm 0.06$        |
| 0.05% GP-CR SIS | $0.40 \pm 0.04$                                               | $1.26 \pm 0.41$        |
| 0.1% GP-CR SIS  | $0.42 \pm 0.03$                                               | $1.12 \pm 0.26$        |
| 0.3% GP-CR SIS  | $0.43 \pm 0.05$                                               | $0.92 \pm 0.20$        |
| 0.5% GP-CR SIS  | $0.41 \pm 0.03$                                               | $0.96 \pm 0.18$        |
